# Supplementary material for: The construction of cross-population polygenic risk scores using transfer learning
Source: PubMed Central journal article supplement — Am J Hum Genet. 2022 Oct 13;109(11):1998–2008. doi: 10.1016/j.ajhg.2022.09.010 (PMC9674947; doi:10.1016/j.ajhg.2022.09.010), 2022-10-13
Supplement: mmc1.pdf [file mmc1.pdf]

**The American Journal of Human Genetics, Volume 109**

**Supplemental information**

**The construction of cross-population polygenic  
risk scores using transfer learning**

**Zhangchen Zhao, Lars G. Fritsche, Jennifer A. Smith, Bhramar Mukherjee, and Seunggeun  
Lee**

# Supplemental Information

## 1. Supplemental Figures

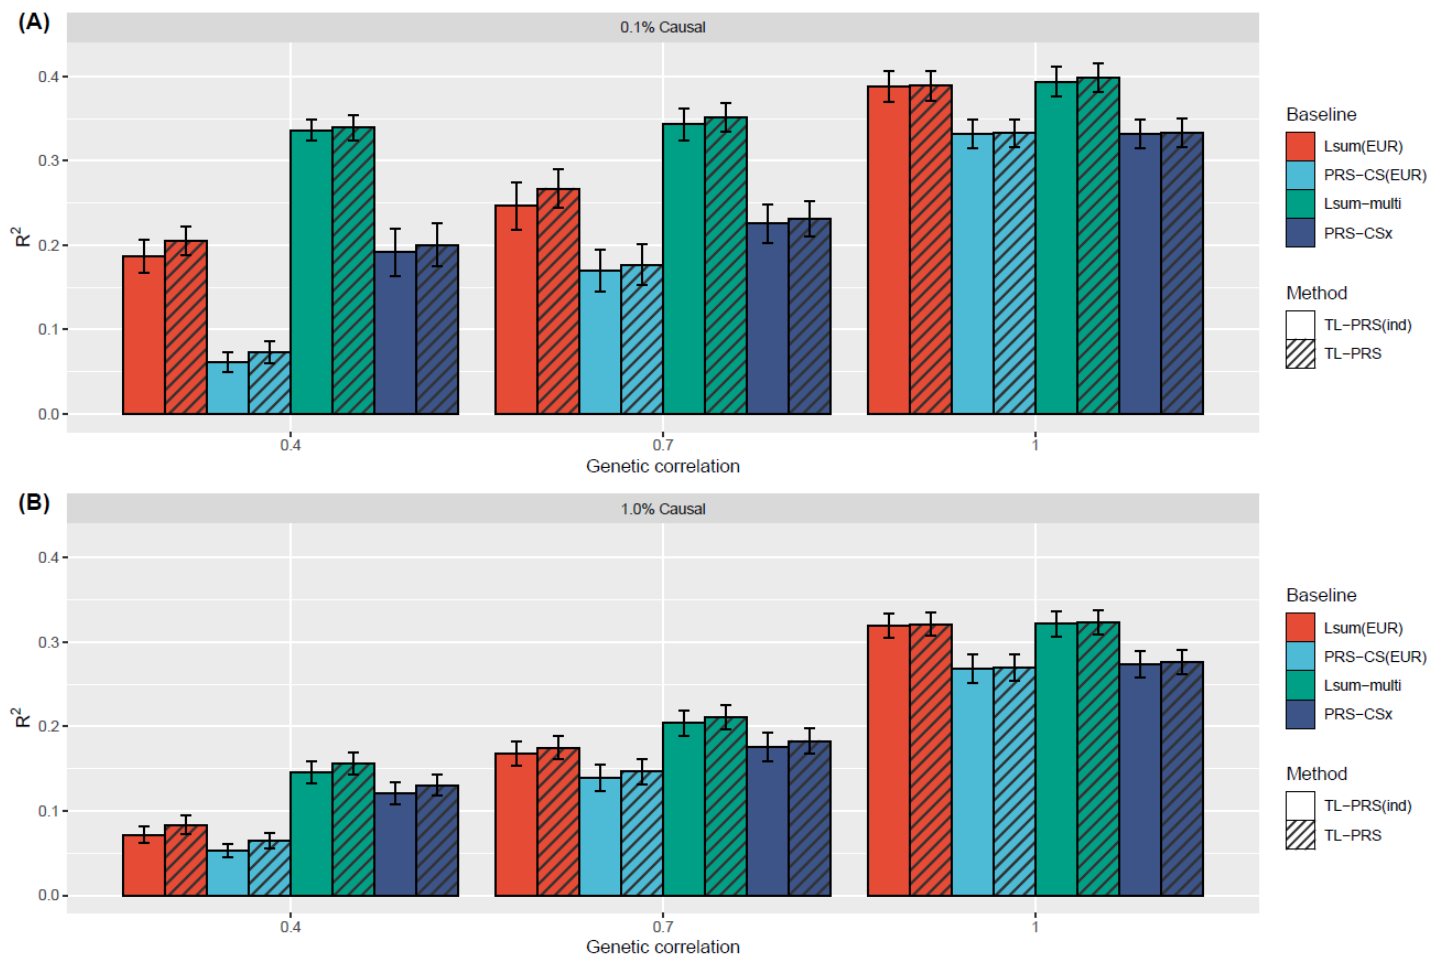

**Figure S1.** Prediction accuracy of TL-PRS(ind) and TL-PRS methods in simulations. (A) The proportion of causal variants is 0.1%; (B) The proportion of causal variants is 1.0%. In each setting, three different cross-population genetic correlations (0.4, 0.7 and 1.0) were considered. Heritability was fixed at 50%. Prediction accuracy was measured by the squared correlation ( $R^2$ ) between the simulated and predicted phenotypes in the testing dataset, averaged across 20 simulation replicates. Error bar indicates the standard deviation of  $R^2$  across simulation replicates.

(a)

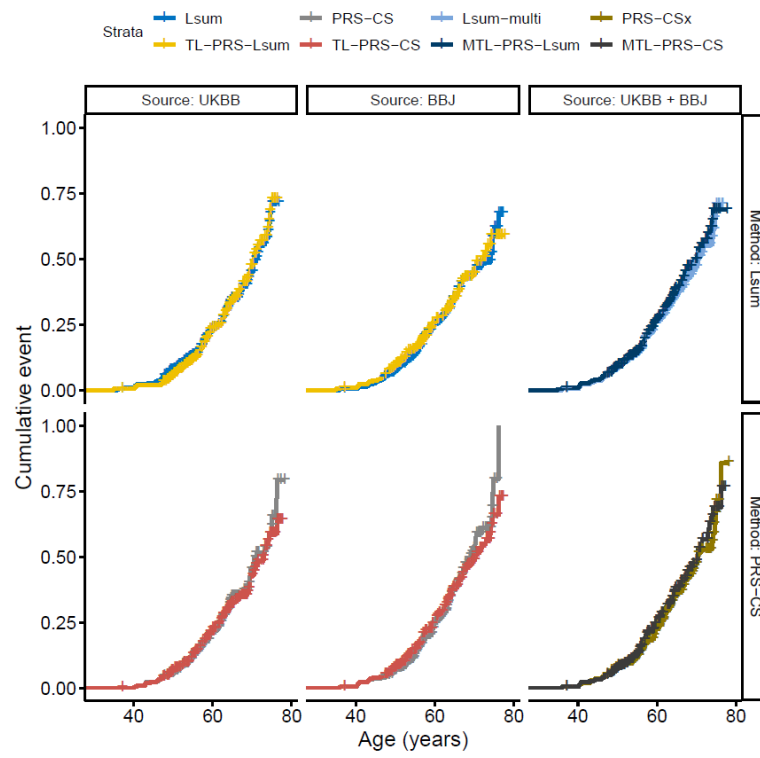

(b)

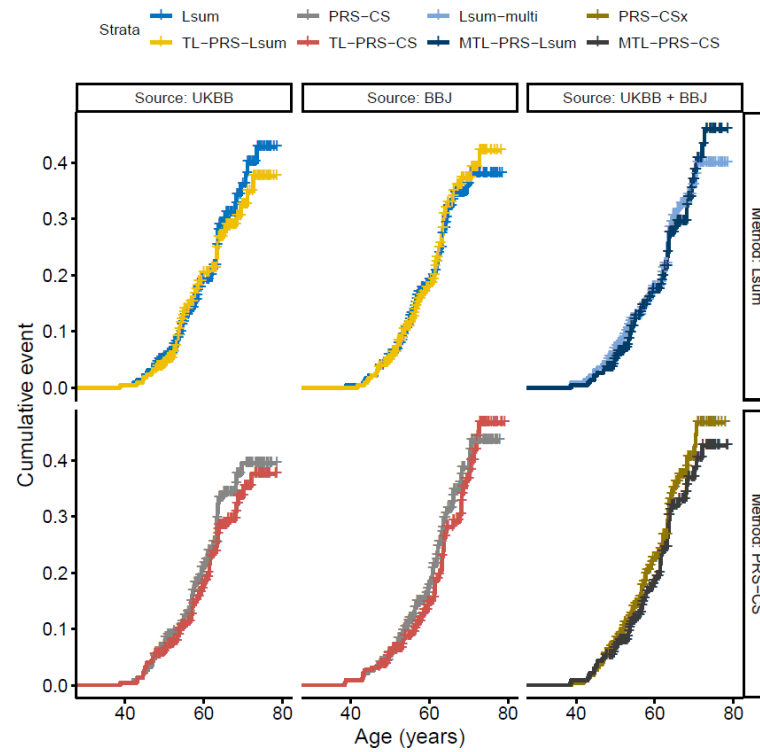

(c)

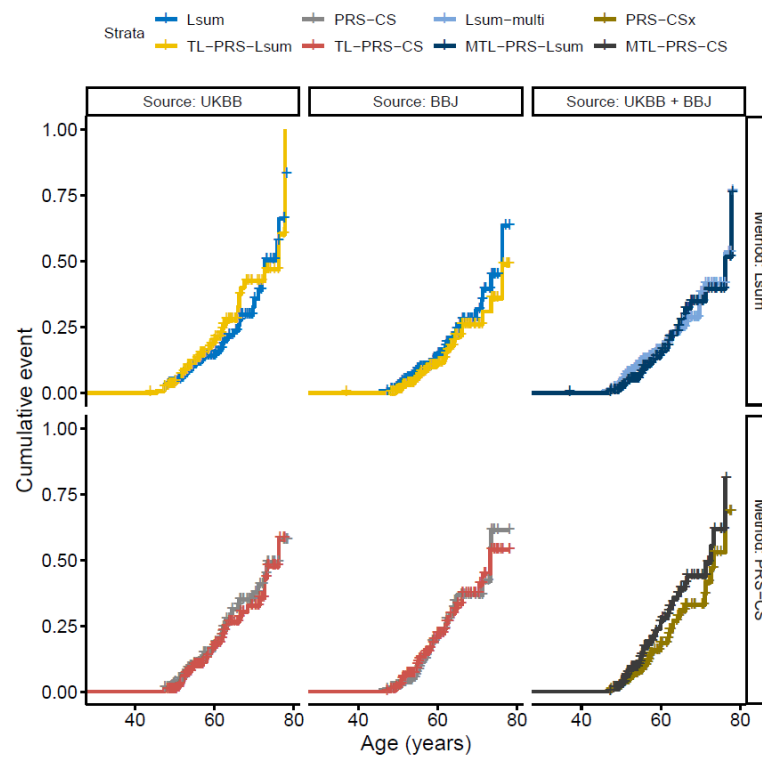

(d)

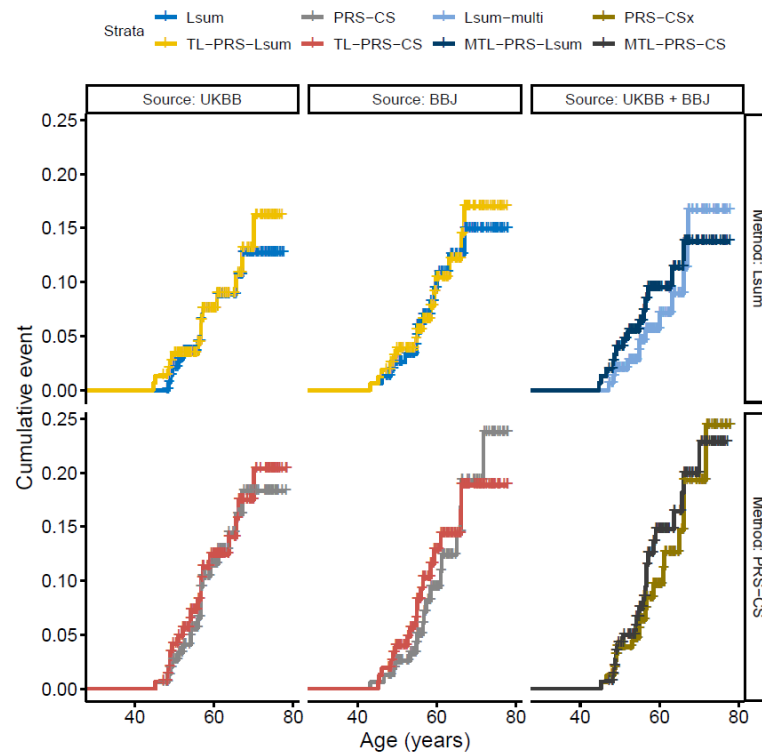

**Figure S2.** Cumulative event plot in terms of the top 10% PRS constructed by transfer learning methods and their baseline methods. Note that y-axes are on different scales in the different panels. (a) South Asian testing samples, Type 2 diabetes, Case: Control=419:2211; (b) South Asian testing samples, Coronary artery disease, Case: Control=362:2270; (c) African testing samples, Type 2 diabetes, Case: Control=177:1812; (d) African testing samples, Coronary artery disease, Case: Control=94:1902.

## 2. Supplemental Tables

| Methods      | Training dataset                 | Validation dataset                     | Testing dataset                                                 |
|--------------|----------------------------------|----------------------------------------|-----------------------------------------------------------------|
| TL-PRS       | Only requires summary statistics | Individual-level data are recommended. | Requires individual-level data to assess prediction performance |
| TL-PRS (ind) | Requires individual-level data   | Requires individual-level data         | Requires individual-level data to assess prediction performance |

**Table S1.** The model requirements of TL-PRS and TL-PRS (ind).

| Target Population | Trait                          | Total sample size | Training sample size | Validation sample size | Testing sample size |
|-------------------|--------------------------------|-------------------|----------------------|------------------------|---------------------|
| South Asian (SAS) | Simulation and real phenotypes | 10,285            | 5,000                | 2,650                  | 2,635               |
| African (AFR)     | real phenotypes                | 8,168             | 4,000                | 2,169                  | 1,999               |

**Table S2.** List of data sets used in simulations and analyses of real phenotypes.

(a)

| Method      | Pre-training data (GWAS summary statistics of source ancestry, and 1000 Genome Project Data) | Training data (target ancestry group)                                                                                            | Validation data (target ancestry group)                                                                        | Testing data (target ancestry group)                       |
|-------------|----------------------------------------------------------------------------------------------|----------------------------------------------------------------------------------------------------------------------------------|----------------------------------------------------------------------------------------------------------------|------------------------------------------------------------|
| PT          | Train PT using pre-training data. Individual-level data are required.                        | Select the hyperparameters using the combination of training and validation data. Individual-level data are required.            |                                                                                                                | Assess prediction performance using individual-level data. |
| Lsum        | Train Lsum using pre-training data. Individual-level data are required.                      | Select the hyperparameters using the combination of training and validation data. Individual-level data are required.            |                                                                                                                | Assess prediction performance using individual-level data. |
| PRS-CS      | Train PRS-CS using pre-training data. Individual-level data are required.                    | Select the hyperparameters using the combination of training and validation data. Individual-level data are <b>not</b> required. |                                                                                                                | Assess prediction performance using individual-level data. |
| TL-PRS-Lsum | Pre-train Lsum using pre-training data. Individual-level data are required.                  | Validate the pre-trained baseline Lsum model, and use it to train TL-PRS-Lsum. Individual-level data are <b>not</b> required.    | Select hyper parameters of the TL-PRS-Lsum model using validation data. Individual-level data are recommended. | Assess prediction performance using individual-level data. |
| TL-PRS-CS   | Pre-train PRS-CS using pre-training data. Individual-level data are required.                | Validate the pre-trained baseline PRS-CS model, and use it to train TL-PRS-CS. Individual-level data are <b>not</b> required.    | Select hyper parameters of the TL-PRS-CS model using validation data. Individual-level data are recommended.   | Assess prediction performance using individual-level data. |

(b)

| Method                            | Training data (target ancestry group)                                                                                                                                                                                   | Validation data (target ancestry group)                                                                            | Testing data (target ancestry group)                      |
|-----------------------------------|-------------------------------------------------------------------------------------------------------------------------------------------------------------------------------------------------------------------------|--------------------------------------------------------------------------------------------------------------------|-----------------------------------------------------------|
| PT-multi<br>Lsum-multi<br>PRS-CSx | Select the weights (hyperparameter) to linearly combine single-source prediction models using combination of training and validation data.<br><br>Individual-level data are required to fine-tune the weight parameter. |                                                                                                                    | Assess prediction performance using individual-level data |
| MTL-PRS-Lsum<br>MTL-PRS-CS        | Select the weights to construct the baseline Lsum-multi/PRS-CSx model, and then implement TL-PRS.<br>Individual-level data are <b>not</b> required.                                                                     | Select hyper parameters of the MTL-PRS models using validation data.<br><br>Individual-level data are recommended. | Assess prediction performance using individual-level data |

**Table S3.** The implementation of prediction methods in the simulation and application of UK Biobank (a) The implementation of single-source prediction methods. (b) The implementation of multi-source prediction methods.

|                     |                        | 0.1% Causal         |                     |                  | 1% Causal           |                     |                   |
|---------------------|------------------------|---------------------|---------------------|------------------|---------------------|---------------------|-------------------|
| Genetic Correlation |                        | 0.4                 | 0.7                 | 1                | 0.4                 | 0.7                 | 1                 |
| TL-PRS-Lsum         | Selected learning rate | 1000<br>(100,1000)  | 100<br>(100,100)    | 100<br>(10,100)  | 1000<br>(100,1000)  | 100<br>(100,100)    | 100<br>(100,100)  |
|                     | Selected iteration     | 3<br>(2,14)         | 10<br>(8,11)        | 3<br>(2,7)       | 3<br>(2,8)          | 12<br>(9,13)        | 4<br>(3,6)        |
| TL-PRS-CS           | Selected learning rate | 1000<br>(1000,1000) | 1000<br>(1000,1000) | 100<br>(100,100) | 1000<br>(1000,1000) | 1000<br>(1000,1000) | 100<br>(100,1000) |
|                     | Selected iteration     | 7<br>(6,8)          | 3<br>(2,4)          | 10<br>(7,13)     | 8<br>(7,9)          | 4<br>(3,4)          | 14<br>(3,15)      |

**Table S4.** The selected learning rates and iterations of TL-PRS-Lsum and TL-PRS-CS in simulations. Two different percentages of causal variants (0.1% and 1% causal variants) and three different cross-population genetic correlations (0.4, 0.7, and 1.0) were considered. The value in each cell is the median and the values in the parentheses represents the 1<sup>st</sup> and 3<sup>rd</sup> quartile of the distribution.



| Target population | trait | Best approach (rank 1)  | Rank 2                 | Rank 3                   |
|-------------------|-------|-------------------------|------------------------|--------------------------|
| South Asian       | HDL   | <i>MTL-PRS-CS</i>       | <i>MTL-PRS-Lsum</i>    | <i>TL-PRS-CS(UKBB)</i>   |
|                   | LDL   | <i>MTL-PRS-Lsum</i>     | Lsum-multi             | <i>MTL-PRS-CS</i>        |
|                   | BMI   | Lsum-multi              | <i>MTL-PRS-Lsum</i>    | <i>MTL-PRS-CS</i>        |
|                   | TG    | Lsum-multi              | PRS-CSx                | <i>MTL-PRS-CS</i>        |
|                   | SBP   | <i>MTL-PRS-Lsum</i>     | <i>MTL-PRS-CS</i>      | PRS-CSx                  |
|                   | DBP   | <i>MTL-PRS-CS</i>       | <i>TL-PRS-CS(UKBB)</i> | <i>MTL-PRS-Lsum</i>      |
|                   | HGT   | <i>MTL-PRS-Lsum</i>     | <i>MTL-PRS-CS</i>      | <i>TL-PRS-Lsum(UKBB)</i> |
|                   | CAD   | <i>MTL-PRS-CS</i>       | PRS-CSx                | Lsum-multi               |
|                   | T2D   | <i>MTL-PRS-CS</i>       | <i>MTL-PRS-Lsum</i>    | PRS-CSx                  |
| African           | HDL   | <i>MTL-PRS-CS</i>       | PRS-CSx                | <i>MTL-PRS-Lsum</i>      |
|                   | LDL   | <i>TL-PRS-Lsum(BBJ)</i> | <i>MTL-PRS-Lsum</i>    | <i>TL-PRS-Lsum(UKBB)</i> |
|                   | BMI   | <i>MTL-PRS-Lsum</i>     | Lsum-multi             | <i>MTL-PRS-CS</i>        |
|                   | TG    | <i>MTL-PRS-CS</i>       | <i>TL-PRS-CS(UKBB)</i> | PRS-CSx                  |
|                   | SBP   | <i>TL-PRS-CS(UKBB)</i>  | PRS-CSx                | <i>MTL-PRS-CS</i>        |
|                   | DBP   | <i>MTL-PRS-CS</i>       | <i>TL-PRS-CS(UKBB)</i> | PRS-CSx                  |
|                   | HGT   | <i>MTL-PRS-Lsum</i>     | lsum-multi             | <i>MTL-PRS-CS</i>        |
|                   | CAD   | PT(UKBB)                | <i>MTL-PRS-CS</i>      | PT-multi                 |
|                   | T2D   | <i>MTL-PRS-CS</i>       | PRS-CS(UKBB)           | <i>TL-PRS-CS(UKBB)</i>   |

**Table S7.** The top three methods for all nine traits in the South Asian and African ancestries in terms of predicted  $R^2$ . Single-source prediction methods (PT, Lsum, TL-PRS-Lsum, PRS-CS, TL-PRS-CS) based on UKBB and BBJ GWAS results and multi-source PRS methods (PT-multi, Lsum-multi, MTL-PRS-Lsum, PRS-CSx, MTL-PRS-CS) were included in the comparison and our approaches were highlighted using italics.

(a)

| Genetic Correlation | 0.1% Causal   |               |               | 1% Causal     |               |               |
|---------------------|---------------|---------------|---------------|---------------|---------------|---------------|
|                     | 0.4           | 0.7           | 1             | 0.4           | 0.7           | 1             |
| <b>PT</b>           | 0.051 (0.011) | 0.159 (0.026) | 0.319 (0.019) | 0.042 (0.007) | 0.126 (0.012) | 0.251 (0.016) |
| <b>Lsum</b>         | 0.060 (0.012) | 0.188 (0.023) | 0.380 (0.020) | 0.053 (0.008) | 0.157 (0.016) | 0.317 (0.014) |
| <b>TL-PRS-Lsum</b>  | 0.205 (0.017) | 0.267 (0.023) | 0.389 (0.018) | 0.083 (0.011) | 0.175 (0.014) | 0.321 (0.014) |
| <b>PRS-CS</b>       | 0.050 (0.012) | 0.165 (0.024) | 0.331 (0.017) | 0.045 (0.006) | 0.133 (0.016) | 0.268 (0.015) |
| <b>TL-PRS-CS</b>    | 0.073 (0.013) | 0.177 (0.024) | 0.333 (0.016) | 0.064 (0.009) | 0.146 (0.015) | 0.270 (0.016) |

(b)

| Genetic Correlation | 0.1% Causal   |               |               | 1% Causal     |               |               |
|---------------------|---------------|---------------|---------------|---------------|---------------|---------------|
|                     | 0.4           | 0.7           | 1             | 0.4           | 0.7           | 1             |
| <b>PT</b>           | 0.049 (0.011) | 0.156 (0.023) | 0.309 (0.017) | 0.034 (0.007) | 0.104 (0.015) | 0.210 (0.014) |
| <b>Lsum</b>         | 0.060 (0.011) | 0.186 (0.023) | 0.373 (0.019) | 0.045 (0.007) | 0.134 (0.016) | 0.268 (0.014) |
| <b>TL-PRS-Lsum</b>  | 0.190 (0.021) | 0.262 (0.019) | 0.382 (0.017) | 0.069 (0.009) | 0.152 (0.017) | 0.273 (0.014) |
| <b>PRS-CS</b>       | 0.047 (0.012) | 0.148 (0.023) | 0.304 (0.020) | 0.038 (0.006) | 0.112 (0.017) | 0.222 (0.014) |
| <b>TL-PRS-CS</b>    | 0.070 (0.013) | 0.161 (0.023) | 0.307 (0.020) | 0.059 (0.008) | 0.127 (0.018) | 0.226 (0.014) |

**Table S8.** Prediction accuracy of single-source polygenic prediction methods in simulations. Two different percentages of causal variants (0.1% and 1% causal variants) and three different cross-population genetic correlations (0.4, 0.7 and 1.0) were considered. Heritability was fixed at 50%. Prediction accuracy was measured by the squared correlation ( $R^2$ ) between the simulated and predicted phenotypes in the testing dataset, averaged across 20 simulation replicates. The number in the parentheses indicates the standard deviation of  $R^2$  across simulation replicates. (a) Simulation with 100,000 European GWAS sample size; (b) Simulation with 50,000 European GWAS sample size.
